# Supplementary material for: Patterns of use of oral health care services and barriers to dental care among ambulatory older Chilean
Source: PubMed Central journal article supplement (PMC5223417; doi:10.1186/s12903-016-0329-2), 2017-01-09
Supplement: 12903_2016_329_MOESM1_ESM.pdf [file 12903_2016_329_MOESM1_ESM.pdf]

ID No.: \_\_\_\_\_

---

# Oral Health Interview

---

1 Interviewer ID \_\_\_\_\_

2 Age (years): \_\_\_\_\_

3 Sex            Female             ①  
                  Male             ②

4 Municipality \_\_\_\_\_

|                                                       |
|-------------------------------------------------------|
| <b><i>TELL ME HOW YOU TAKE CARE OF YOUR MOUTH</i></b> |
|-------------------------------------------------------|

Which of the following oral health practices did you perform yesterday?

(Check **all** that apply; mark one circle on each line)

|           |                               | <b>yes</b> | <b>no</b> |
|-----------|-------------------------------|------------|-----------|
| <b>5</b>  | Brushing                      | ①          | ②         |
| <b>6</b>  | Flossing                      | ①          | ②         |
| <b>7</b>  | Use of wood stick             | ①          | ②         |
| <b>8</b>  | Use of toothpicks             | ①          | ②         |
| <b>9</b>  | Mouthwashes                   | ①          | ②         |
| <b>10</b> | Others. Please, specify _____ | ①          | ②         |

**11** How often do you brush your teeth? (Mark one circle only)

- ① Once a day
- ② 2 or more times a day
- ③ 3 times or less a week
- ④ At least once a week
- ⑤ Less than once a week
- ⑥ Never

**12** How often do you use dental floss? (Mark one circle only)

- ① 2 or more times a day
- ② Once a day
- ③ 3 times or less a week
- ④ At least once a week
- ⑤ Less than once a week
- ⑥ Never

**13** How much oral health information do you receive? (Mark one circle only)

- ① Too much
- ② Right amount
- ③ Not enough

**Please indicate where have you seen or heard information about oral health**

| (Check <b>all</b> that apply; <i>Mark one circle on each line</i> ) |                                              | Yes | No |
|---------------------------------------------------------------------|----------------------------------------------|-----|----|
| 14                                                                  | TV                                           | ①   | ②  |
| 15                                                                  | Radio                                        | ①   | ②  |
| 16                                                                  | Newspaper, magazines                         | ①   | ②  |
| 17                                                                  | Health brochures                             | ①   | ②  |
| 18                                                                  | Friends, relatives, neighbors                | ①   | ②  |
| 19                                                                  | Health Clinics, medical centers,             | ①   | ②  |
| 20                                                                  | Street advertisement, in trains, buses, etc. | ①   | ②  |
| 21                                                                  | Other, specify                               | ①   | ②  |

**During the LAST 6 MONTHS, how often have you experienced the following:**

|    | Never                                                                                                           | Seldom | Sometimes | Often | Very often | Always |
|----|-----------------------------------------------------------------------------------------------------------------|--------|-----------|-------|------------|--------|
| 22 | How often did you limit the kinds or amounts of food you eat because of problems with your teeth or dentures?   | ①      | ②         | ③     | ④          | ⑤      |
| 23 | How often did you have trouble biting or chewing any kinds of food, such as firm meat or apples?                | ①      | ②         | ③     | ④          | ⑤      |
| 24 | How often were you able to swallow comfortably?                                                                 | ①      | ②         | ③     | ④          | ⑤      |
| 25 | How often have your teeth or dentures prevented you from speaking the way you wanted?                           | ①      | ②         | ③     | ④          | ⑤      |
| 26 | How often were you able to eat anything without feeling discomfort?                                             | ①      | ②         | ③     | ④          | ⑤      |
| 27 | How often did you limit contacts with people because of the condition of your teeth or dentures?                | ①      | ②         | ③     | ④          | ⑤      |
| 28 | How often were you pleased or happy with the looks of your teeth and gums, or dentures?                         | ①      | ②         | ③     | ④          | ⑤      |
| 29 | How often did you use medication to relieve pain or discomfort from around your mouth?                          | ①      | ②         | ③     | ④          | ⑤      |
| 30 | How often were you worried or concerned about the problems with your teeth, gums, or dentures?                  | ①      | ②         | ③     | ④          | ⑤      |
| 31 | How often did you feel nervous or self-conscious because of problems with your teeth, gums, or dentures?        | ①      | ②         | ③     | ④          | ⑤      |
| 32 | How often did you feel uncomfortable eating in front of people because of problems with your teeth or dentures? | ①      | ②         | ③     | ④          | ⑤      |
| 33 | How often were your teeth or gums sensitive to hot, cold, or sweets?                                            | ①      | ②         | ③     | ④          | ⑤      |

## THINKING ABOUT ORAL HEALTH

**In your opinion, what are some of the warning signs of tooth decay (dental caries)?**

*(Mark one circle on each line)*

|           |                                                        | Yes | No | Do not know |
|-----------|--------------------------------------------------------|-----|----|-------------|
| <b>34</b> | Pain in the tooth under hot or cold (e.g. food, water) | ①   | ②  | ③           |
| <b>35</b> | Pain in the tooth when eating sweets                   | ①   | ②  | ③           |
| <b>36</b> | Continuous pain                                        | ①   | ②  | ③           |
| <b>37</b> | Change of colour of tooth to darker shade              | ①   | ②  | ③           |
| <b>38</b> | Hole in tooth                                          | ①   | ②  | ③           |
| <b>39</b> | There are no warning signs                             | ①   | ②  | ③           |

**In your opinion, what are some of the warning signs of gum (or periodontal) disease?**

*(Mark one circle on each line)*

|           |                            | Yes | No | Do not know |
|-----------|----------------------------|-----|----|-------------|
| <b>40</b> | Pain in the gums           | ①   | ②  | ③           |
| <b>41</b> | Pain in the teeth          | ①   | ②  | ③           |
| <b>42</b> | Bad breath                 | ①   | ②  | ③           |
| <b>43</b> | Bleeding gums              | ①   | ②  | ③           |
| <b>44</b> | Swelling gums              | ①   | ②  | ③           |
| <b>45</b> | Loose tooth                | ①   | ②  | ③           |
| <b>46</b> | Change of colour of gums   | ①   | ②  | ③           |
| <b>47</b> | There are no warning signs | ①   | ②  | ③           |

**In your opinion, what are some of the warning signs of oral cancer?**

*(Mark one circle on each line)*

|           |                                                    | Yes | No | Do not know |
|-----------|----------------------------------------------------|-----|----|-------------|
| <b>48</b> | Pain                                               | ①   | ②  | ③           |
| <b>49</b> | Sore or ulcer in mouth or lips                     | ①   | ②  | ③           |
| <b>50</b> | White/red patch in the mouth that does not go away | ①   | ②  | ③           |
| <b>51</b> | Tongue or jaw movement become difficult            | ①   | ②  | ③           |
| <b>52</b> | There are no warning signs                         | ①   | ②  | ③           |

***After I read each of the following, tell me if you think it is very important, probably important, probably not important, or definitively not important in preventing dental caries (tooth decay)?***

|                                               | Very important | Probably important | Probably not important | Definitively not important | Do not know |
|-----------------------------------------------|----------------|--------------------|------------------------|----------------------------|-------------|
| <b>53</b> Brushing teeth                      | ①              | ②                  | ③                      | ④                          | ⑤           |
| <b>54</b> Use dental floss                    | ①              | ②                  | ③                      | ④                          | ⑤           |
| <b>55</b> Drink fluoridated water             | ①              | ②                  | ③                      | ④                          | ⑤           |
| <b>56</b> Use fluoridated toothpaste          | ①              | ②                  | ③                      | ④                          | ⑤           |
| <b>57</b> Use dental sealant                  | ①              | ②                  | ③                      | ④                          | ⑤           |
| <b>58</b> Cut down frequency of eating sweets | ①              | ②                  | ③                      | ④                          | ⑤           |
| <b>59</b> Make regular dental visits          | ①              | ②                  | ③                      | ④                          | ⑤           |

*Now, I am going to ask about preventing gum disease (periodontal disease). How important or not important is each of the following statements in preventing gum disease?*

|           | <b>How important is:</b>            | <b>Very important</b> | <b>Probably important</b> | <b>Probably not important</b> | <b>Definitively not important</b> | <b>Do not know</b> |
|-----------|-------------------------------------|-----------------------|---------------------------|-------------------------------|-----------------------------------|--------------------|
| <b>60</b> | Brushing teeth                      | ①                     | ②                         | ③                             | ④                                 | ⑤                  |
| <b>61</b> | Use dental floss                    | ①                     | ②                         | ③                             | ④                                 | ⑤                  |
| <b>62</b> | Drink fluoridated water             | ①                     | ②                         | ③                             | ④                                 | ⑤                  |
| <b>63</b> | Use fluoridated toothpaste          | ①                     | ②                         | ③                             | ④                                 | ⑤                  |
| <b>64</b> | Use dental sealant                  | ①                     | ②                         | ③                             | ④                                 | ⑤                  |
| <b>65</b> | Cut down frequency of eating sweets | ①                     | ②                         | ③                             | ④                                 | ⑤                  |
| <b>66</b> | Make regular dental visits          | ①                     | ②                         | ③                             | ④                                 | ⑤                  |

*Now, I am going to ask about mouth or lip cancer. How important or not important is each of the following statements in causing mouth or lip cancer?*

|           | <b>How important is:</b>                | <b>Very important</b> | <b>Probably important</b> | <b>Probably not important</b> | <b>Definitively not important</b> | <b>Do not know</b> |
|-----------|-----------------------------------------|-----------------------|---------------------------|-------------------------------|-----------------------------------|--------------------|
| <b>67</b> | Heredity                                | ①                     | ②                         | ③                             | ④                                 | ⑤                  |
| <b>68</b> | Spending time under the sun             | ①                     | ②                         | ③                             | ④                                 | ⑤                  |
| <b>69</b> | Bad nutrition                           | ①                     | ②                         | ③                             | ④                                 | ⑤                  |
| <b>70</b> | Ageing                                  | ①                     | ②                         | ③                             | ④                                 | ⑤                  |
| <b>71</b> | Smoking                                 | ①                     | ②                         | ③                             | ④                                 | ⑤                  |
| <b>72</b> | Poorly fitted full or partial denture   | ①                     | ②                         | ③                             | ④                                 | ⑤                  |
| <b>73</b> | Excessive drinking of alcohol           | ①                     | ②                         | ③                             | ④                                 | ⑤                  |
| <b>74</b> | Regular use of both alcohol and tobacco | ①                     | ②                         | ③                             | ④                                 | ⑤                  |

## More About ORAL HEALTH ...

*For the following items, please tell me how much do you agree or disagree with each of the following statements.*

*Remember there is no right or wrong answer, we are interested in your opinion*

|           |                                                                                     | Strongly agree | Agree | Disagree | Strongly disagree |
|-----------|-------------------------------------------------------------------------------------|----------------|-------|----------|-------------------|
| <b>75</b> | There is a lot an older person can do to prevent oral disease                       | ①              | ②     | ③        | ④                 |
| <b>76</b> | Older adults have to learn to live with the condition of their teeth and gums       | ①              | ②     | ③        | ④                 |
| <b>77</b> | As people become older, they can expect to lose their teeth                         | ①              | ②     | ③        | ④                 |
| <b>78</b> | Getting dentures is better than keeping your own teeth                              | ①              | ②     | ③        | ④                 |
| <b>79</b> | Only dental professionals can examine my mouth for any sign of cancer of the mouth. | ①              | ②     | ③        | ④                 |
| <b>80</b> | Having dental problems is a normal part of aging                                    | ①              | ②     | ③        | ④                 |
| <b>81</b> | Only people with their own teeth need to see the dentist                            | ①              | ②     | ③        | ④                 |

## TELL ME ABOUT YOUR USE OF ORAL HEALTH CARE SERVICES

**82** In the last 12 months did you have and oral health problems for which you would have wanted to see a dentist?

- ① No
- ② Yes
- ③ Yes and visited

**83** When did you last visit a dentist? *(Mark one circle only)*

- ① 12 months or less
- ② More than 12 months, but less than 2 years
- ③ 2 years, but less than 5 years
- ④ 5 years, but less than 10 years
- ⑤ 10 years or more
- ⑥ Never been to a dentist in Australia
- ⑦ Never been to a dentist in my life
- ⑧ Do not know

**84 The main reason for your last visit to the dentist was?**

- ① Tooth extraction
  - ② Tooth cleaning
  - ③ Relief of pain
  - ④ Fluoride application
  - ⑤ Dental crown or Filling(s)
  - ⑥ Denture (Construction, fitted, repaired, relined, adjusted)
  - ⑦ Soft tissues consultation (Sore or ulcer in lips, tongue, etc)
  - ⑧ Gum treatment
  - ⑨ Check up only
  - ⑩ X Rays
- Other treatment . Please, specify \_\_\_\_\_

**85 Where did you go for your last visit? (Mark one circle only)**

- ① Community Health Centre
- ② Private practice
- ③ Dental technician
- ④ Other. Please, specify \_\_\_\_\_

**Have any of the following stopped you seeking oral health services?**  
*(Check all that apply; mark one circle on each line)*

|           |                                                                     | <b>Yes</b> | <b>No</b> |
|-----------|---------------------------------------------------------------------|------------|-----------|
| <b>86</b> | Cost                                                                | ①          | ②         |
| <b>87</b> | Availability of dentists                                            | ①          | ②         |
| <b>88</b> | Time waiting for appointments (waiting lists)                       | ①          | ②         |
| <b>89</b> | Rude behaviour from dentists                                        | ①          | ②         |
| <b>90</b> | Rude behaviour from non-professionals (receptionist, dental nurses) | ①          | ②         |
| <b>91</b> | Location of services (transportation)                               | ①          | ②         |
| <b>92</b> | Waiting time in surgery                                             | ①          | ②         |
| <b>93</b> | Fear of dentist/treatments/procedures                               | ①          | ②         |
| <b>94</b> | Physical disability (access)                                        | ①          | ②         |
| <b>95</b> | General health problem                                              | ①          | ②         |
| <b>96</b> | Communication/language problems                                     | ①          | ②         |

**97 Marital status?**

- ① Single
- ② Married
- ③ De-facto relationship
- ④ Divorced/separated
- ⑤ Widow/widower

**98 Are you covered by any Health Insurance?**

- ① National Health Fund
- ② Private Health Fund (ISAPRE)
- ③ Force Armed
- ④ Other

**99 What is the highest level of education you reached? (Mark one circle only)**

- ① No formal education
- ② Primary incomplete (year 1-6)
- ③ Primary complete
- ④ Secondary incomplete
- ⑤ Secondary complete
- ⑥ Tertiary education (complete or incomplete)

**100 What is your current occupational status?**

- ① Dependent worker (employee)
- ② Independent worker (self-employed, entrepreneur)
- ③ Unemployed
- ④ Retired
- ⑤ Not working outside home
- ⑥ Not actively seeking for work. Specify, \_\_\_\_\_

***Have we missed anything?***

**If there ANY OTHER ISSUES that you would like to comment on, please tell me and I will write it down?**

---

---

---

---

**Thank you very much for your time and effort in completing this questionnaire.**

**Your efforts are greatly appreciated.  
Please remember that we guarantee confidentiality  
and we will not read your name to anyone.**
